# Supplementary material
Source: publisher figshare collection journal article supplement (https://acs.figshare.com/ndownloader/files/3860137)
Supplement: Supplementary file 1 [file 3860137]

# Environmental influence on the surface chemistry of ionic-liquid-mediated lubrication in a silica / silicon tribopair

*Andrea Arcifa<sup>a</sup>, Antonella Rossi<sup>a, b</sup>, Rosa M. Espinosa-Marzal<sup>a, c</sup>, Nicholas D. Spencer<sup>a</sup>*

<sup>a</sup> Lab. for Surface Science and Technology, Dept. of Materials, ETH Zurich, CH-8093 Zurich, Switzerland

<sup>b</sup> Dipartimento di Scienze Chimiche e Geologiche, Università di Cagliari, 09042 Cagliari, Italy

<sup>c</sup> Laboratory for Smart Interfaces in Environmental Nanotechnology, Department of Civil & Environmental Engineering, University of Illinois at Urbana-Champaign

3215 Newmark Lab, MC 2 , Urbana, IL 61801, USA

The **peak-fitting** parameters for the high-resolution XP-spectra of tribostressed samples are reported in Tables S1-S2. A list of the binding energies of the compounds considered for the chemical-state analysis of the tribostressed wafer is reported in Table S3. Three replicas of a tribological test carried out in the presence of humid air with [HMIM] FAP as a lubricant, applying a load of 0.5 N are reported in Figure S1. Replicas of the tribological tests carried out applying a load of 4.5 N are reported in Figure S2, S3, S4, and S5. The survey and high-resolution spectra of tribostressed silicon disks lubricated with [EMIM] FAP, applying a load of 4.5 N, are reported in Figures S6-S8. Optical and scanning electron micrographs of tribostressed disks lubricated with [EMIM] FAP are reported in Figures S9 and S10.

#### **Ionic Liquids used in the present study:**

[EMIM]  
FAP

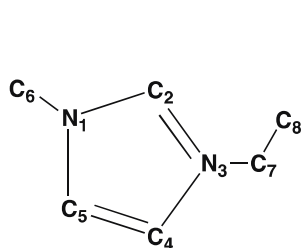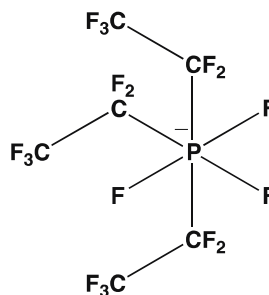

[HMIM]  
FAP

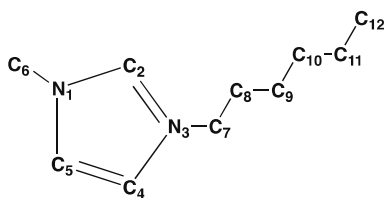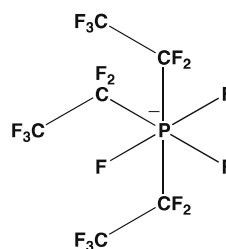

**Table S1:** Peak-fitting parameters for the XP-spectra of silicon samples tribostressed with [EMIM] FAP or [HMIM] FAP ionic liquids in the presence of a nitrogen atmosphere. Normal load: 4.5 N, sliding speed: 50 mm/min, number of cycles: 200, radius: 3.2 mm. The uncertainty in the binding energies (BE) and in the full widths at half-maximum (FWHM) is 0.2 eV.

|                        |            | <i>Line shape</i> | <i>Contact area</i> |                  | <i>Non-contact area</i> |                  |
|------------------------|------------|-------------------|---------------------|------------------|-------------------------|------------------|
|                        |            |                   | <i>BE (eV)</i>      | <i>FWHM (eV)</i> | <i>BE (eV)</i>          | <i>FWHM (eV)</i> |
| C1s*                   | $SiC_xO_y$ | GL(30)            | 283.8               | 1.4              | -                       | -                |
|                        | $C-C$      | GL(30)            | 285.0               | 1.4              | 285.0                   | 1.4              |
|                        | $C-O$      | GL(30)            | 286.3               | 1.4              | 286.3                   | 1.4              |
|                        | $C=O$      | GL(30)            | 287.6               | 1.4              | 286.6                   | 1.4              |
| N1s                    | $SiN_xO_y$ | GL(30)            | 398.2               | 1.8              | -                       | -                |
| F1s                    | $F-Si$     | GL(30)            | 686.8               | 1.8              | -                       | -                |
|                        | $SiO_xF_y$ | GL(30)            | 687.9               | 1.8              | 687.9                   | 1.7              |
| O1s                    | $O-Si$     | GL(50)            | 532.9               | 1.9              | 533.1                   | 1.7              |
| Si2p <sub>3/2</sub> ** | $Si^0$     | LA(1.5,1.8,65)    | 99.3                | 0.6              | 99.3                    | 0.6              |
|                        | $Si^+$     | GL(30)            | 100.3               | 0.9              | 100.3                   | 0.9              |
|                        | $Si^{2+}$  | GL(30)            | 101.2               | 0.9              | 101.2                   | 0.9              |
|                        | $Si^{3+}$  | GL(30)            | 101.8               | 0.9              | 101.8                   | 0.9              |
|                        | $Si^{4+}$  | GL(30)            | 103.2               | 1.8              | 103.6                   | 1.5              |

\*The position of the C-O and COOX components are constrained at a distance of +1.3 and +1.6 eV from the C-C signal. The FWHM of the C1s components is constrained at 1.4 eV.

\*\* The position of the components having intermediate oxidation states are constrained according to Seah et al. <sup>1</sup>

**Table S2:** Peak-fitting parameters for the XP-spectra of silicon samples tribostressed with [EMIM] FAP or [HMIM] FAP ionic liquids in the presence of a humid air (45% - 55% RH). Normal load: 4.5 N, sliding speed: 50 mm/min, number of cycles: 200, radius: 3.2 mm. The uncertainty of the binding energies (BE) and of the full widths at half-maximum (FWHM) is 0.2 eV.

|                     |            | <i>Line shape</i> | <i>Contact area</i> |                  | <i>Non contact area</i> |                  |
|---------------------|------------|-------------------|---------------------|------------------|-------------------------|------------------|
|                     |            |                   | <i>BE (eV)</i>      | <i>FWHM (eV)</i> | <i>BE (eV)</i>          | <i>FWHM (eV)</i> |
| C1s                 | $SiC_xO_y$ | GL(30)            | 284.0               | 1.4              | -                       | -                |
|                     | $C-C$      | GL(30)            | 285.0               | 1.4              | 285.0                   | 1.4              |
|                     | $C-O$      | GL(30)            | 286.3               | 1.4              | 286.3                   | 1.4              |
|                     | $C=O$      | GL(30)            | 287.6               | 1.4              | 286.6                   | 1.4              |
| N1s                 | $SiN_xO_y$ | GL(30)            | -                   | -                | -                       | -                |
| F1s                 | $F-Si$     | GL(30)            | 686.8               | 1.8              | -                       | -                |
|                     | $SiO_xF_y$ | GL(30)            | 687.9               | 1.8              | 687.9                   | 1.8              |
| O1s                 | $O-Si$     | GL(50)            | 533.1               | 2.0              | 533.1                   | 1.7              |
| Si2p <sub>3/2</sub> | $Si^0$     | LA(1.5,1.8,65)    | 93.0                | 0.6              | 93.0                    | 0.6              |
|                     | $Si^+$     | GL(30)            | 100.3               | 0.9              | 100.3                   | 0.9              |
|                     | $Si^{2+}$  | GL(30)            | 101.2               | 0.9              | 101.2                   | 0.9              |
|                     | $Si^{3+}$  | GL(30)            | 101.8               | 0.9              | 101.8                   | 0.9              |
|                     | $Si^{4+}$  | GL(30)            | 103.6               | 1.8              | 103.6                   | 1.5              |

\*The positions of the C-O and COOX components are constrained at a distance of +1.3 and +1.6 eV from the C-C signal. The FWHM of the C1s components is constrained at 1.4 eV.

\*\* The position of the components having intermediate oxidation states is constrained according to Seah et al. <sup>1</sup>

**Table S3:** Binding energies of the compounds considered for the chemical-state analysis of the tribostressed silicon disks.

|      | <i>Chemical state</i>                             | <i>Binding energy (eV)</i> |
|------|---------------------------------------------------|----------------------------|
| Si2p | Silicon <sup>2</sup>                              | 99.3                       |
|      | Silicon carbide <sup>3</sup>                      | 100.2                      |
|      | Silicon oxycarbide <sup>3</sup>                   | 100.6-101.4                |
|      | SiO <sub>x</sub> (Si <sup>+1</sup> ) <sup>1</sup> | 100.3                      |
|      | SiO <sub>x</sub> (Si <sup>+2</sup> ) <sup>1</sup> | 101.2                      |
|      | SiO <sub>x</sub> (Si <sup>+3</sup> ) <sup>1</sup> | 101.8                      |
|      | SiO <sub>x</sub> (Si <sup>+4</sup> ) <sup>1</sup> | 102.6 – 104.1              |
|      | Si-F (Si <sup>+1</sup> ) <sup>4</sup>             | 100.3 – 100.5              |
|      | S-F (Si <sup>+2</sup> ) <sup>4</sup>              | 101.3 – 100.8              |
|      | Si-F (Si <sup>+3</sup> ) <sup>4</sup>             | 102.4 – 102.8              |
| C1s  | Silicon carbide <sup>5</sup>                      | 283.0                      |
|      | Silicon oxycarbide <sup>3</sup>                   | 283.6                      |
|      | Graphitic <sup>6</sup>                            | 284.4                      |
|      | Organic bonded to Si <sup>7</sup>                 | 283.9                      |
|      | Aliphatic <sup>8</sup>                            | 285.0                      |
|      | Carbon bound to oxygen <sup>8</sup>               | 286.1-286.6                |
|      |                                                   | 287.8                      |
| N1s  | Silicon oxynitride <sup>9</sup>                   | 398.3                      |
| F1s  | Silicon oxyfluoride <sup>10</sup>                 | 686.4                      |
|      | Si-F <sup>10</sup>                                | 687.8 – 688.0              |

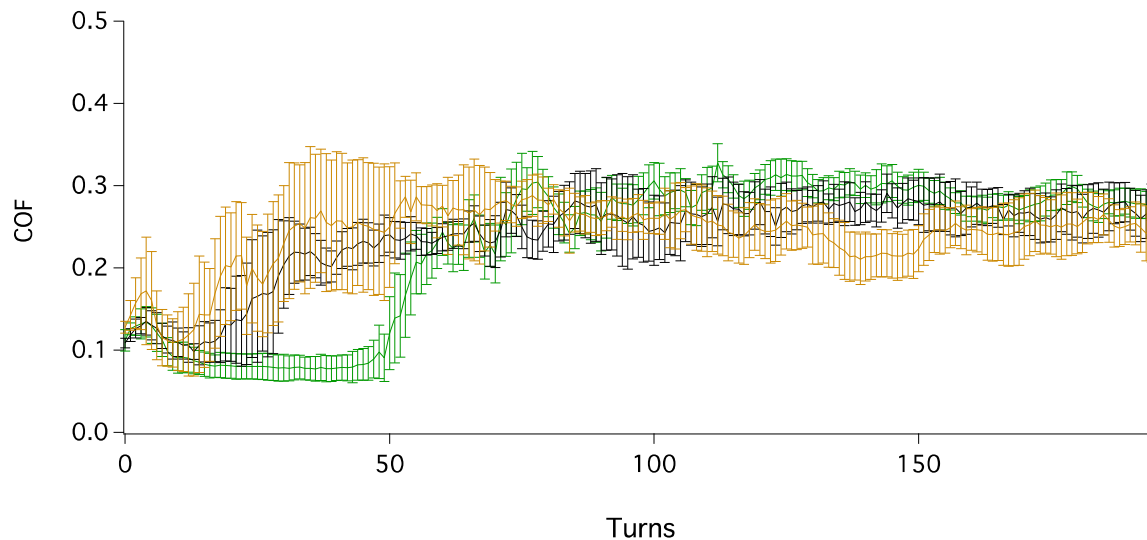

**Figure S1:** Coefficient of friction versus number of cycles (sliding time) during three tribological tests (normal load: 0.5 N sliding speed: 50 mm/min, radius: 3.2 mm) carried out in the presence of [HMIM] FAP at room temperature ( $296 \pm 2$  K) and humid air (45% - 55% RH). Error bars express the standard deviation of friction data over a single cycle.

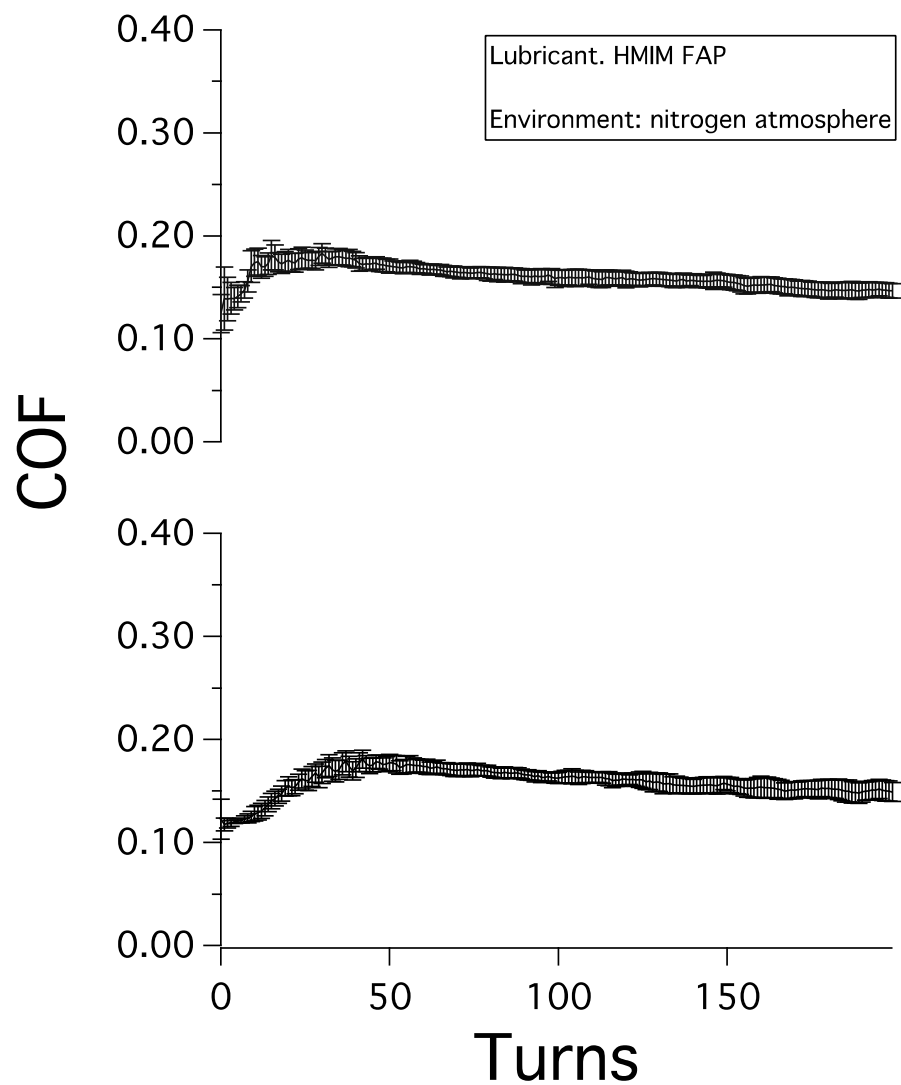

**Figure S2:** Coefficient of friction versus number of cycles (sliding time) during two tribological tests (normal load: 0.5 N sliding speed: 50 mm/min, radius: 3.2 mm) carried out in the presence of [HMIM] FAP at room temperature ( $296 \pm 2$  K) and under nitrogen. Error bars express the standard deviation of friction data over a single cycle.

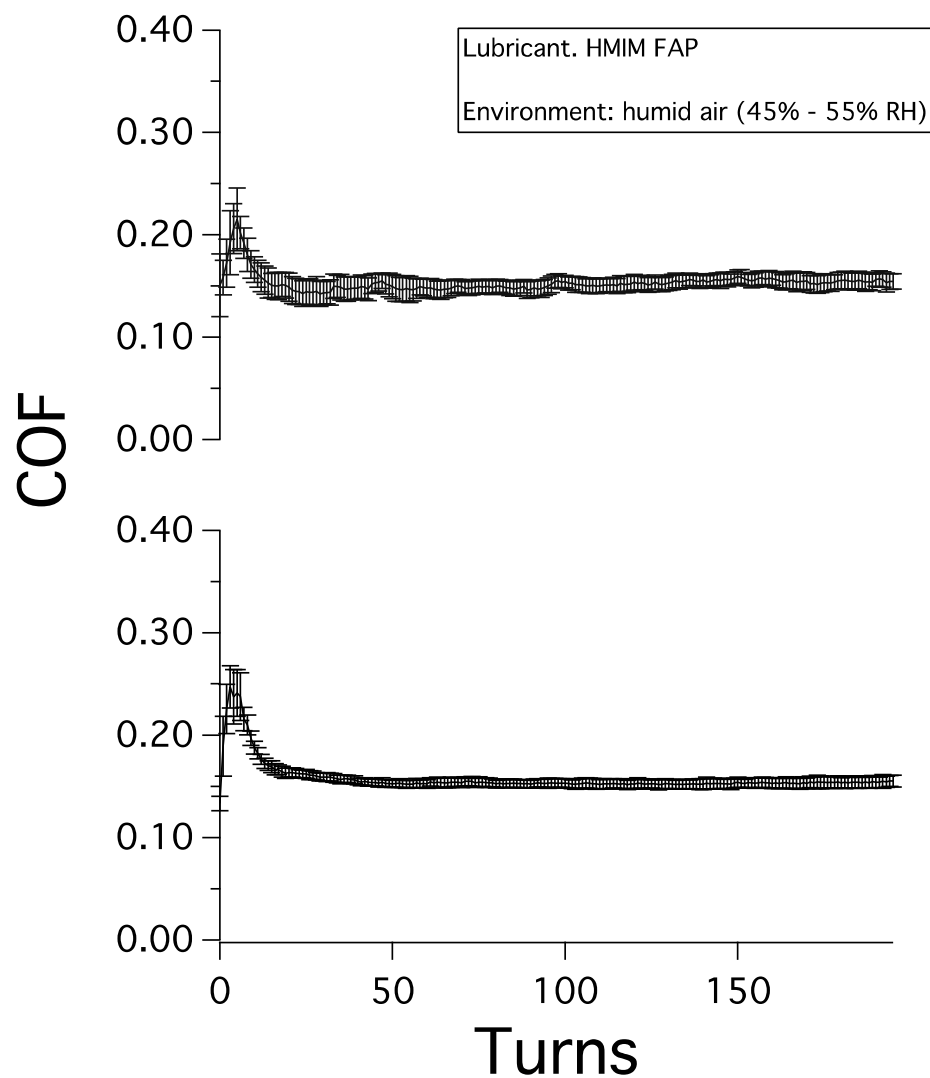

**Figure S3:** Coefficient of friction versus number of cycles (sliding time) during two tribological tests (normal load: 0.5 N sliding speed: 50 mm/min, radius: 3.2 mm) carried out in the presence of [HMIM] FAP at room temperature ( $296 \pm 2$  K) and humid air (45% - 55% RH). Error bars express the standard deviation of friction data over a single cycle.



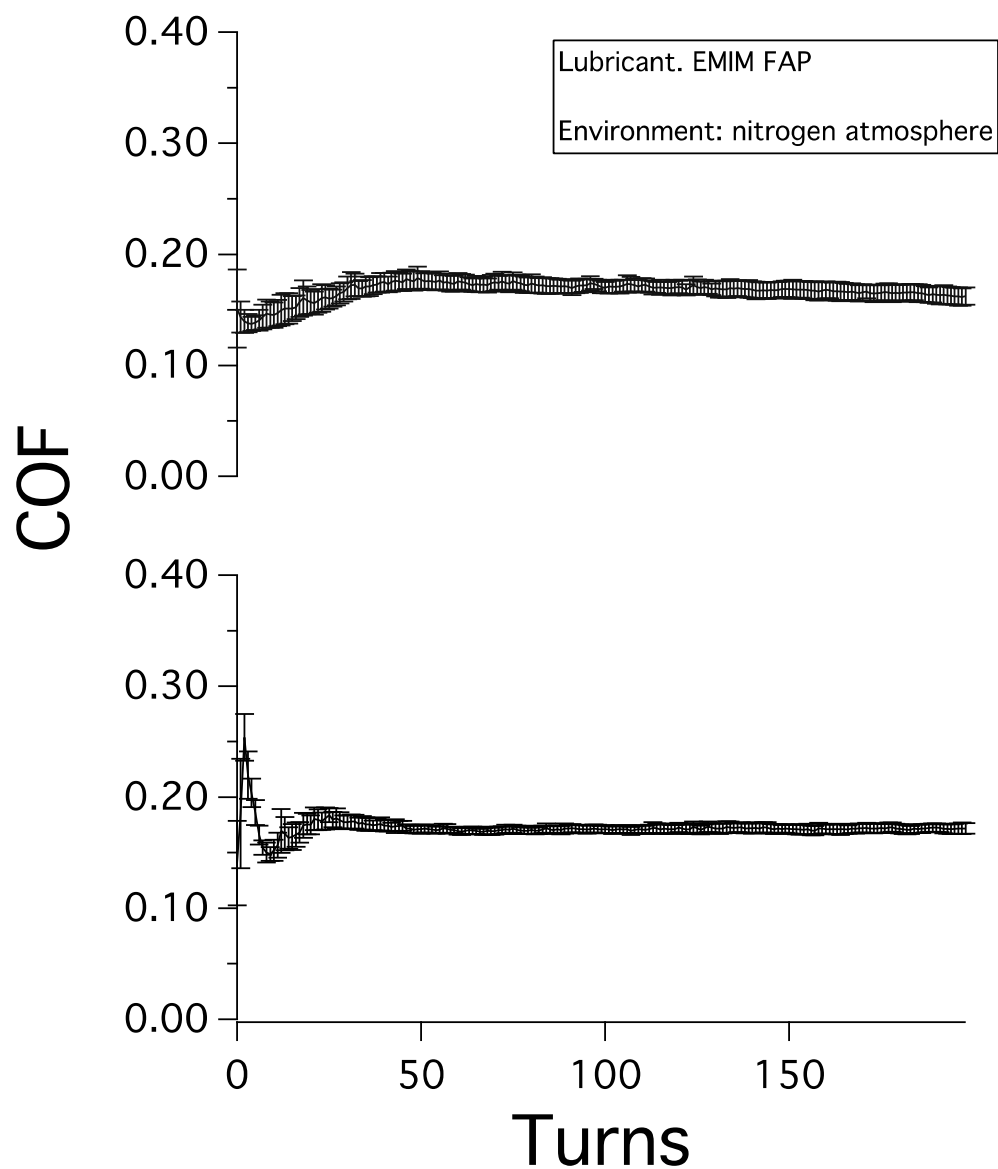

**Figure S4:** Coefficient of friction versus number of cycles (sliding time) during two tribological tests (normal load: 0.5 N sliding speed: 50 mm/min, radius: 3.2 mm) carried out in the presence of [EMIM] FAP at room temperature ( $296 \pm 2$  K) and under nitrogen. Error bars express the standard deviation of friction data over a single cycle.

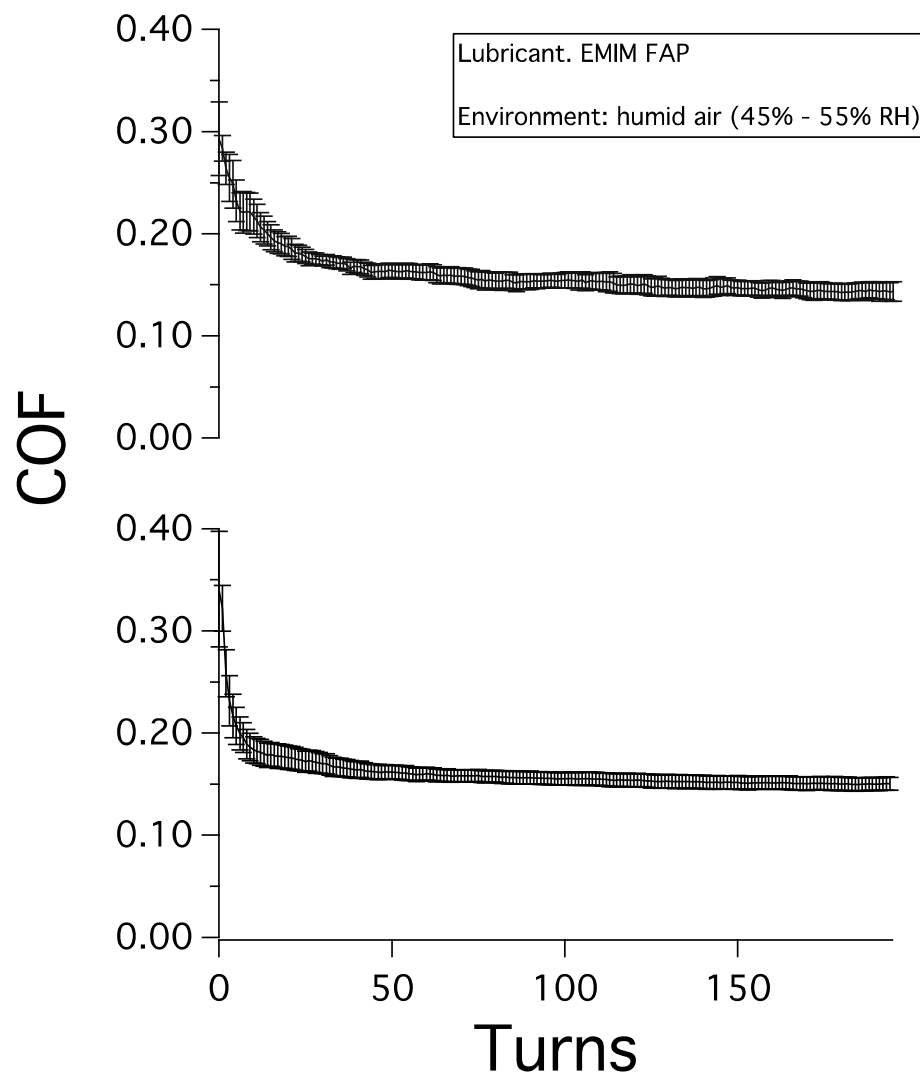

**Figure S5:** Coefficient of friction versus number of cycles (sliding time) during two tribological tests (normal load: 0.5 N sliding speed: 50 mm/min, radius: 3.2 mm) carried out in the presence of [EMIM] FAP at room temperature ( $296 \pm 2$  K) and humid air (45% - 55% RH). Error bars express the standard deviation of friction data over a single cycle.

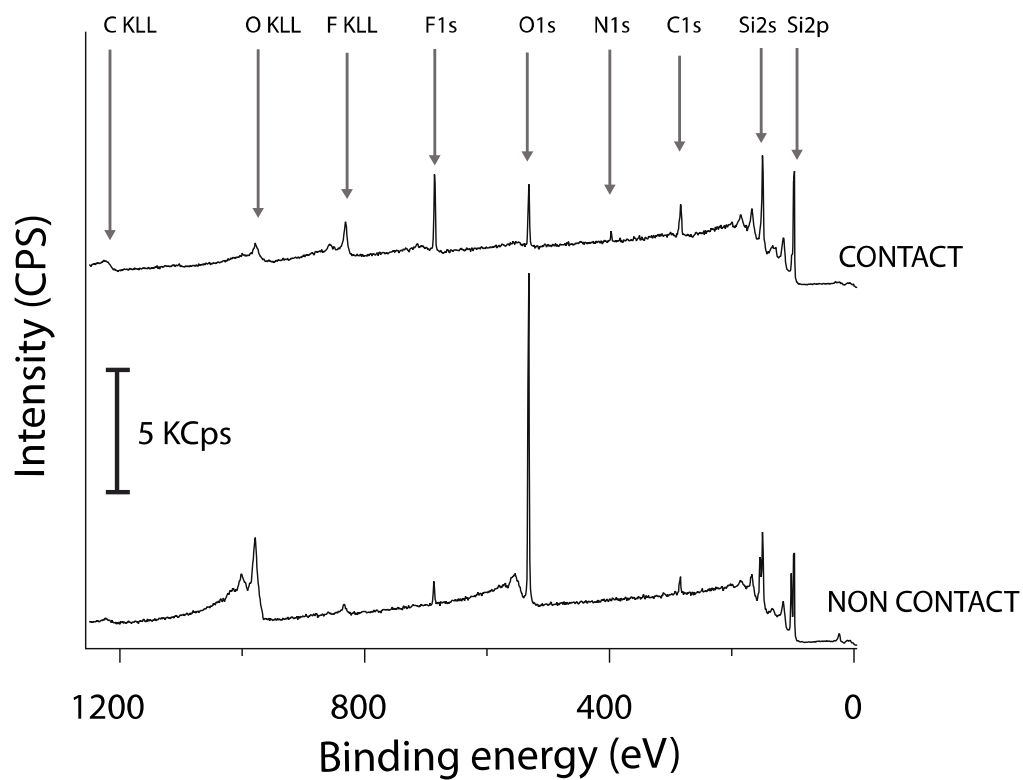

**Figure S6:** Survey XP-spectra of a silicon disk lubricated with [EMIM] FAP under a nitrogen atmosphere. Normal load: 4.5 N, sliding speed: 50 mm/min, number of cycles: 200, radius: 3.2 mm.

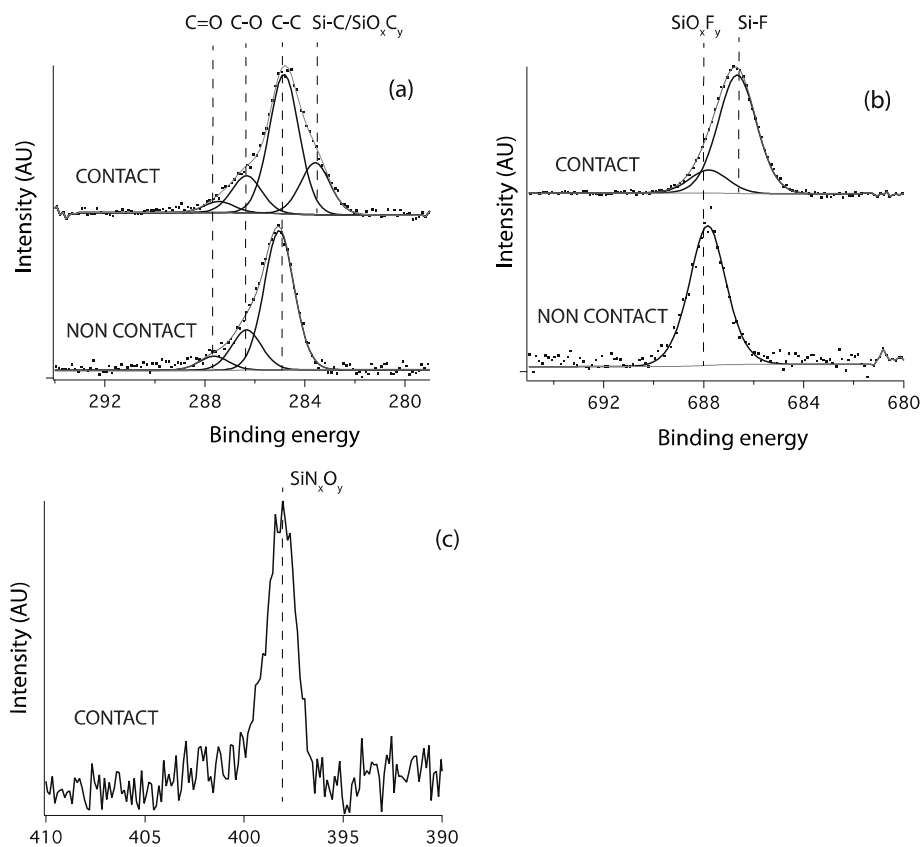

**Figure S7:** C1s (a), F1s (b) and N1s (c) regions of the XP- spectra of a silicon disk lubricated with [EMIM] FAP in the presence of a nitrogen atmosphere. Normal load: 4.5 N, sliding speed: 50 mm/min, number of cycles: 200, radius: 3.2 mm.

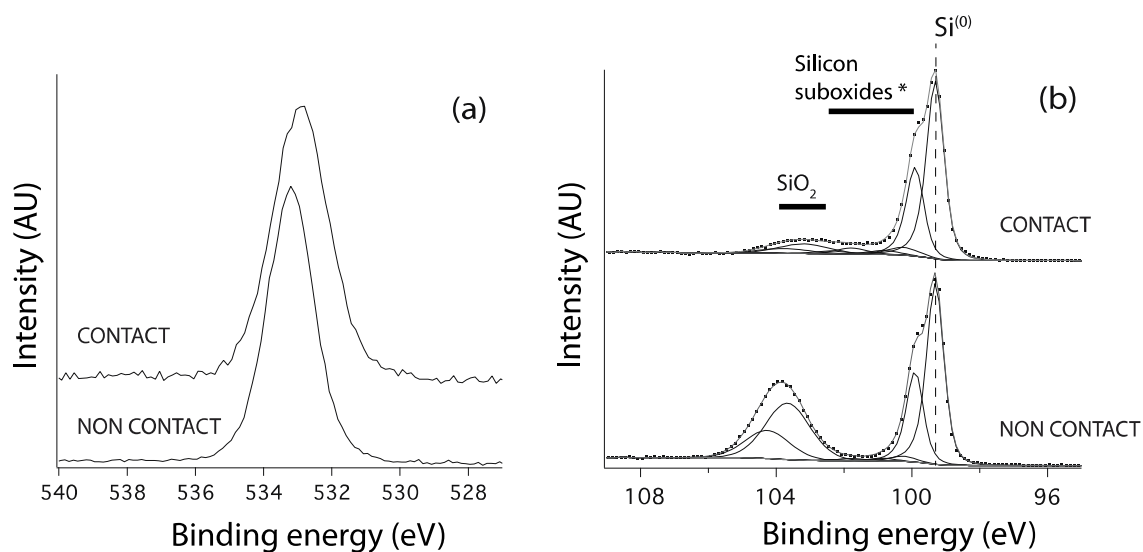

**Figure S8:** O1s (a) and Si2p (b) XP-spectra of a silicon disk lubricated with [EMIM] FAP in the presence of a nitrogen atmosphere. Each Si signal is fitted with two components due to spin-orbit coupling ( $2p_{3/2}$  and  $2p_{1/2}$ ). The region labeled as “Silicon suboxides” could also contain contributions from  $\text{SiO}_x\text{F}_y$ ,  $\text{SiC}_x\text{O}_y$ ,  $\text{SiN}_x\text{O}_y$ . Normal load: 4.5 N sliding speed: 50 mm/min, Normal load: 4.5 N, sliding speed: 50 mm/min, number of cycles: 200, radius: 3.2 mm.

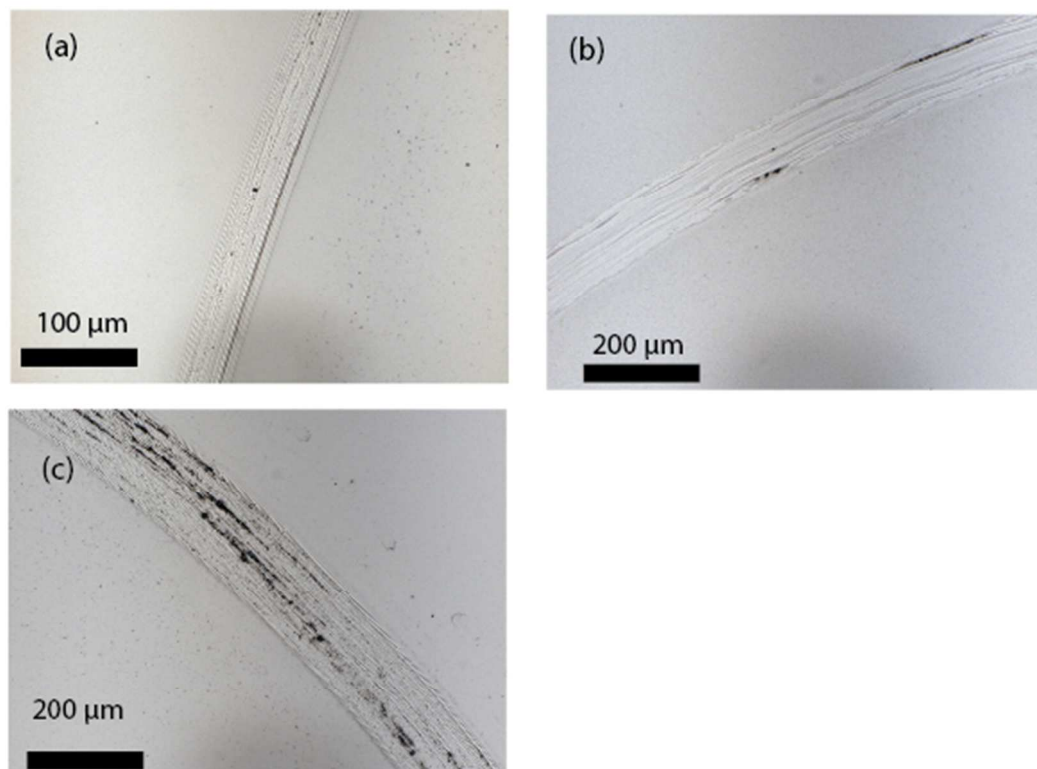

**Figure S9:** Optical micrographs of the contact area of silicon wafers lubricated with [EMIM] FAP; (a) normal load: 0.5 N, environment: humid air (45%-55% RH); (b) normal load: 4.5 N, environment: nitrogen atmosphere; (c) normal load: 4.5 N, environment: humid air (45%-55% RH). All the tests were performed at a sliding speed of 50 mm/min and a duration of 200 cycles (radius: 3.2 mm)

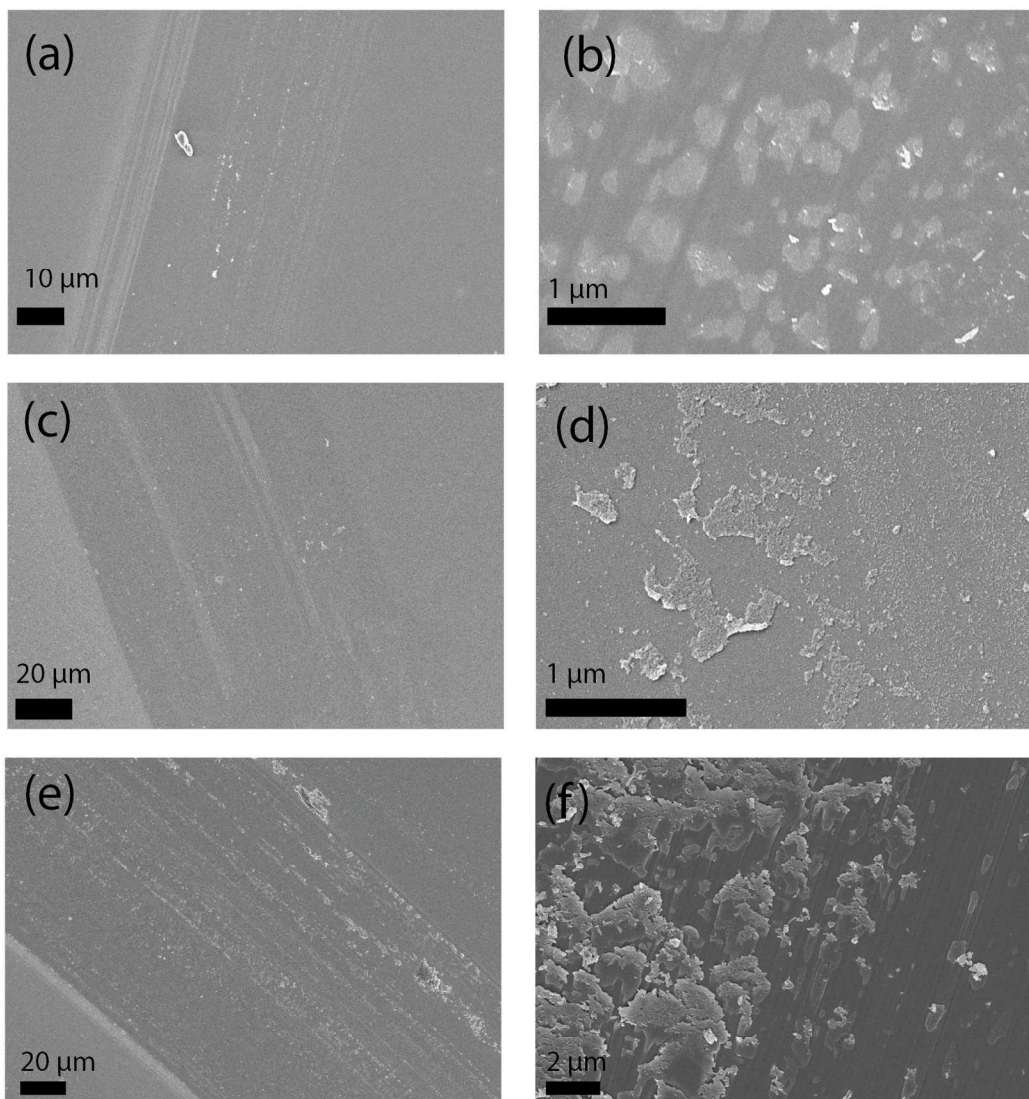

**Figure S10:** SEM images of the contact area of silicon wafers lubricated with [EMIM] FAP; (a) and (b) normal load: 0.5 N, environment: humid air (45%-55% RH); (c) and (d) normal load: 4.5 N, environment: nitrogen atmosphere; (e) and (f) normal load: 4.5 N, environment: humid air (45%-55% RH). All the tests were performed at a sliding speed of 50 mm/min and for a duration of 200 cycles (radius: 3.2 mm).

## References

1. Seah, M. P.; Spencer, S. J., Ultrathin SiO<sub>2</sub> on Si IV. Intensity Measurement in XPS and Deduced Thickness Linearity. *Surf. Interface Anal.* **2003**, *35*, 515-524.
2. Keister, J. W.; Rowe, J. E.; Kolodziej, J. J.; Niimi, H.; Tao, H.-S.; Madey, T. E.; Lucovsky, G., Structure of ultrathin SiO<sub>2</sub>/Si(111) Interfaces Studied by Photoelectron Spectroscopy. *J. Vac. Sci. Technol., A* **1999**, *17*, 1250-1257.
3. Guinel, M. J.-F.; Norton, M. G., Oxidation of Silicon Carbide and the Formation of Silica Polymorphs. *J. Mater. Res.* **2006**, *21*, 2550-2563.
4. McFeely, F. R.; Morar, J. F.; Shinn, N. D.; Landgren, G.; Himpsel, F. J., Synchrotron Photoemission Investigation of the Initial Stages of Fluorine Attack on Si surfaces: Relative Abundance of Fluorosilyl Species. *Phys. Rev. B* **1984**, *30*, 764-770.
5. Kusunoki, I.; Igari, Y., XPS study of a SiC Film Produced on Si(100) by Reaction with a CH<sub>2</sub>H<sub>2</sub> Beam. *Appl. Surf. Sci.* **1992**, *59*, 95-104.
6. Díaz, J.; Paolicelli, G.; Ferrer, S.; Comin, F., Separation of the sp<sup>3</sup> and sp<sup>2</sup> Components in the C1s Photoemission Spectra of Amorphous Carbon Films. *Phys. Rev. B* **1996**, *54*, 8064-8069.
7. Nemanick, E. J.; Hurley, P. T.; Webb, L. J.; Knapp, D. W.; Michalak, D. J.; Brunschwig, B. S.; Lewis, N. S., Chemical and Electrical Passivation of Single-Crystal Silicon(100) Surfaces through a Two-Step Chlorination/Alkylation Process. *J. Phys. Chem. B* **2006**, *110*, 14770-14778.
8. Beamson, G.; Briggs, D., *High Resolution XPS of Organic Polymers: The Scienta ESCA300 Database*. 1992. John Wiley & Sons: Chichester (UK), 1992.



9. Cerofolini, G. F.; Caricato, A. P.; Meda, L.; Re, N.; Sgamellotti, A., Quantum-mechanical Study of Nitrogen Bonding Configurations at the Nitrided SiO<sub>2</sub> Interface via Model Molecules. *Phys. Rev. B* **2000**, *61*, 14157-14166.
10. Haring, R. A.; Liehr, M., Reactivity of a fluorine Passivated Silicon Surface. *J. Vac. Sci. Technol., A* **1992**, *10*, 802-805.
